# Supplementary material for: Cellular Immune Function in Myalgic Encephalomyelitis/Chronic Fatigue Syndrome (ME/CFS)
Source: PubMed Central journal article supplement (PMC6477089; doi:10.3389/fimmu.2019.00796), 2019-04-16
Supplement: Table_1.pdf [file Table_1.pdf]

**Supplementary Table S1: Clinical parameters collected from study population**

| <b>Questionnaires</b>                                                                                                                                                                                                                                                                                                                                                                                                                                                                        | <b>Clinical assessments</b>                                                                                                                                                                                                                                                                                                                         | <b>Blood tests</b>                                                                                                                                                                                                                                                                                                                                                                                                                                      |
|----------------------------------------------------------------------------------------------------------------------------------------------------------------------------------------------------------------------------------------------------------------------------------------------------------------------------------------------------------------------------------------------------------------------------------------------------------------------------------------------|-----------------------------------------------------------------------------------------------------------------------------------------------------------------------------------------------------------------------------------------------------------------------------------------------------------------------------------------------------|---------------------------------------------------------------------------------------------------------------------------------------------------------------------------------------------------------------------------------------------------------------------------------------------------------------------------------------------------------------------------------------------------------------------------------------------------------|
| <ul style="list-style-type: none"><li>● Symptoms experienced</li><li>● Sociodemographic variables</li><br/><li>● Family and individual health histories</li><br/><li>● Potential risk factors (exposures)</li><br/><li>● Medical Outcomes Survey Short Form (SF-36v2™)</li><br/><li>● General Health Questionnaire (GHQ-28)</li><br/><li>● Epworth sleepiness score</li><br/><li>● Fatigue scales assessing severity and disability</li><br/><li>● Pain and fatigue analogue scale</li></ul> | <ul style="list-style-type: none"><li>● urinalysis by dipstick</li><br/><li>● pulse oximetry</li><br/><br/><li>● blood pressure (seated and standing)</li><br/><li>● standing height</li><br/><br/><li>● weight and bioimpedance</li><br/><li>● waist circumference</li><br/><br/><li>● hand grip strength test</li><br/><li>● spirometry</li></ul> | <ul style="list-style-type: none"><li>● full blood count</li><br/><li>● blood chemistry and creatinine</li><br/><li>● liver function</li><br/><br/><li>● thyroid function</li><br/><br/><li>● C reactive protein (CRP)</li><br/><br/><li>● erythrocyte sedimentation rate (ESR)</li><br/><br/><li>● rheumatoid factor</li><br/><br/><li>● tissue transglutaminase antibodies</li><br/><br/><li>● serum vitamin B12</li><br/><br/><li>● folate</li></ul> |
