# Supplementary material for: Cellular Immune Function in Myalgic Encephalomyelitis/Chronic Fatigue Syndrome (ME/CFS)
Source: PubMed Central journal article supplement (PMC6477089; doi:10.3389/fimmu.2019.00796), 2019-04-16
Supplement: Table_3.pdf [file Table_3.pdf]

**Supplementary Table S3: Flow cytometry staining panels for differentiation status and MAIT cell phenotype**

| Panel A   |              |        |           |            | Panel B   |              |        |           |             |
|-----------|--------------|--------|-----------|------------|-----------|--------------|--------|-----------|-------------|
| Marker    | Fluorochrome | Clone  | Company   | Cat#       | Marker    | Fluorochrome | Clone  | Company   | Cat#        |
| CD45      | FITC         | 2D1    | BD        | 345808     | CD45RA    | BB515        | H100   | BD        | 564552      |
| CD11c     | PE           | B-ly6  | BD        | 555392     | CD161     | PE           | 191B8  | Miltenyi  | 130-092-677 |
| CD123     | PE-eF610     | 6H6    | eBio      | 61-1239    | Va7.2     | PE-DAZZLE    | 3C10   | Biolegend | 351730      |
| CD19      | PC5.5        | H1B19  | eBio      | 45-0199    | CD28      | PC5.5        | CD28.2 | eBio      | 45-0289     |
| Va24      | PC7          | 6B11   | Biolegend | 342911     | gdTCR     | PC7          | B1     | Biolegend | 331221      |
| Vb11      | APC          | REA657 | Miltenyi  | 130109-    | CCR7      | APC          | 3D12   | eBio      | 17-1979     |
| CD14      | AF700        | 61D3   | eBio      | 56-0149-   | CD4       | AF700        | RPA-T4 | eBio      | 56-0049     |
| Viability | eF780        | n/a    | eBio      | 65-0865-14 | Viability | eF780        | n/a    | eBio      | 65-0865-14  |
| CD57      | e450         | TB01   | eBio      | 48-0577-   | CD57      | e450         | TB01   | eBio      | 48-0577-    |
| CD3       | V500         | UCHT1  | BD        | 561416     | CD3       | V500         | UCHT1  | BD        | 561416      |
| CD56      | BV605        | HCD56  | Biolegend | 318334     | CD8       | BV605        | RPA-T8 | Biolegend | 301040      |
